# Supplementary material
Source: PubMed Central journal article supplement (PMC5076854)
Supplement: NIHMS823501-supplement-supplement_1.pdf [file NIHMS823501-supplement-supplement_1.pdf]

**Table SI.** Number of individuals sampled per group used in this study. Complete groups for males (those used for analyses of intragroup relatedness) are those in which all adult males were sampled and complete groups for females are those in which all adult females were sampled.

| Group                          | n M<br>sampled | n F<br>sampled | n immatures<br>sampled | All M<br>sampled?    | All F<br>sampled?    |
|--------------------------------|----------------|----------------|------------------------|----------------------|----------------------|
| <b><i>A. pigra</i> Central</b> |                |                |                        |                      |                      |
| 1                              | 2              | 3              | 3                      | Y                    | Y                    |
| 2                              | 2              | 1              | 1                      | Y                    | N                    |
| 3                              | 2              | 1              | 1                      | Y                    | N                    |
| 4                              | 1              | 3              | 1                      | N                    | Y                    |
| 5                              | 3              | 3              | 1                      | Y                    | Y                    |
| 10A                            | 1              | 2              | 0                      | N                    | Y                    |
| 20A                            | 2              | 1              | 1                      | Y                    | N                    |
| 10                             | 2              | 3              | 2                      | Y                    | Y                    |
| 11                             | 2              | 2              | 1                      | Y                    | Y                    |
| 12                             | 1              | 2              | 1                      | N                    | Y                    |
| 13                             | 2              | 1              | 1                      | Y                    | N                    |
| <b><i>A. pigra</i> Outlier</b> |                |                |                        |                      |                      |
| C                              | 2              | 2              | 1                      | N                    | Y                    |
| W                              | 1              | 2              | 1                      | N                    | Y                    |
| <b>Total</b>                   | 23             | 26             | 15                     | 8 complete<br>groups | 9 complete<br>groups |
| <b><i>A. palliata</i> West</b> |                |                |                        |                      |                      |
| A                              | 1              | 4              | 0                      | N                    | Y                    |
| J                              | 1              | 1              | 0                      | N                    | N                    |
| K                              | 1              | 0              | 1                      | N                    | N                    |
| R                              | 1              | 2              | 2                      | N                    | Y                    |
| Y                              | 1              | 3              | 2                      | N                    | Y                    |
| 78                             | 3              | 1              | 1                      | Y                    | N                    |
| 79                             | 4              | 1              | 1                      | N                    | N                    |
| <b><i>A. palliata</i> East</b> |                |                |                        |                      |                      |
| 69                             | 1              | 2              | 2                      | N                    | N                    |
| 74                             | 3              | 10             | 9                      | Y                    | N                    |
| 77                             | 2              | 1              | 0                      | Y                    | N                    |
| 80                             | 2              | 2              | 2                      | Y                    | N                    |
| 81                             | 1              | 2              | 3                      | N                    | N                    |
| B                              | 1              | 3              | 1                      | N                    | Y                    |
| 14                             | 2              | 5              | 0                      | Y                    | N                    |
| 22                             | 2              | 2              | 0                      | N                    | N                    |
| 24                             | 1              | 1              | 0                      | N                    | N                    |

|              |    |    |    |                      |                      |
|--------------|----|----|----|----------------------|----------------------|
| 25           | 2  | 4  | 0  | Y                    | Y                    |
| 26           | 2  | 1  | 1  | Y                    | N                    |
| 42           | 3  | 8  | 3  | N                    | N                    |
| 43           | 0  | 0  | 1  | N                    | N                    |
| 45           | 4  | 0  | 3  | N                    | N                    |
| 49           | 1  | 3  | 3  | N                    | N                    |
| 52           | 2  | 1  | 1  | N                    | N                    |
| 53           | 1  | 2  | 3  | N                    | Y                    |
| <b>Total</b> | 42 | 59 | 39 | 7 complete<br>groups | 6 complete<br>groups |

---

M=adult males, F=adult females
